# Supplementary material for: The association between physical activity and subjective well-being among adolescents in southwest China by parental absence: a moderated mediation model
Source: Springer Nature journal article supplement (doi:10.1186/s12888-023-04982-8), 2023-07-10
Supplement: MOESM1 [file 25599108]

## Appendix 1

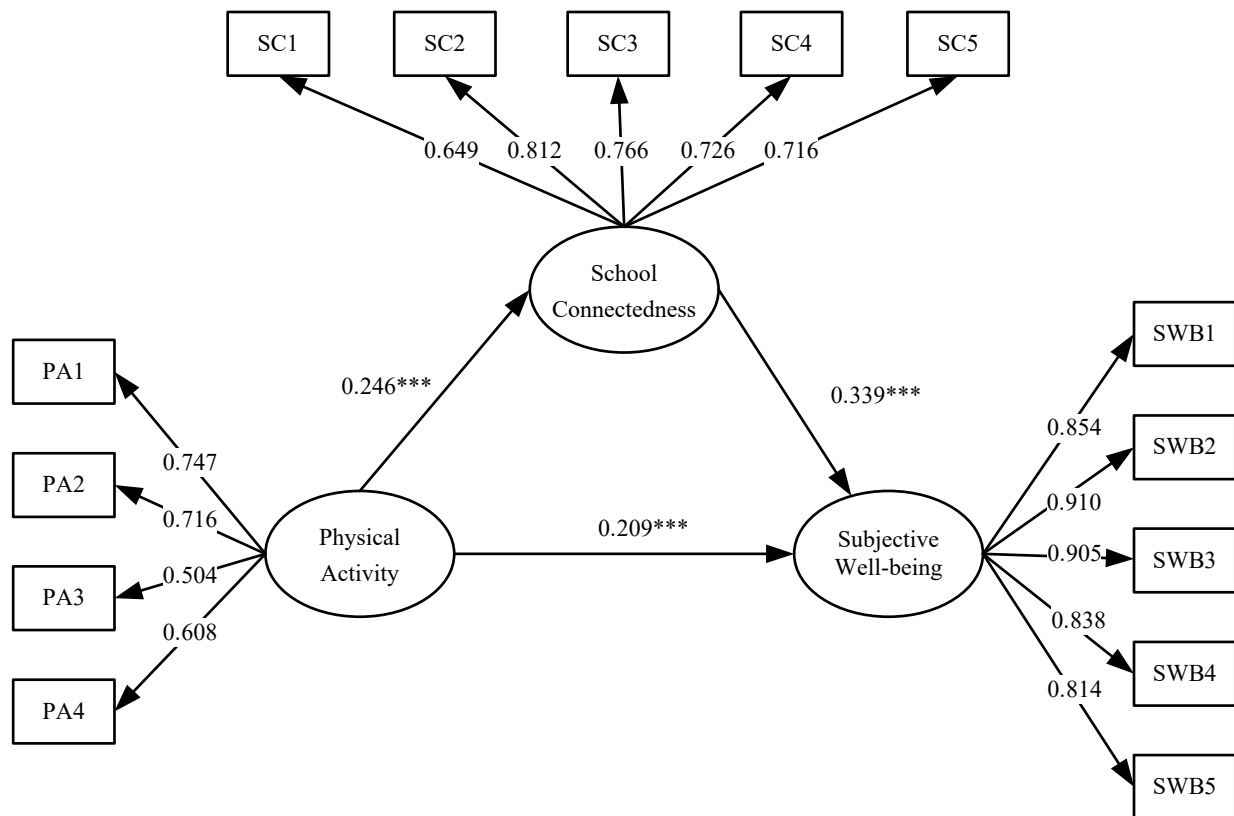

**Appendix Fig. 1** Standardized SEM coefficients ( $N=3143$ ) for the association between physical activity and subjective well-being among adolescents in southwest China: the mediating role of school connectedness.

**Notes:** PA1-PA4 represent the 4 items of the physical activity scale, SC1-SC5 represent the 5 items of the school connectedness scale, and SWB1-SWB5 represent the 5 items of the WHO-5 scale. And the pathways from the control variables (i.e., gender, age, and ethnicity) to subjective well-being are omitted. \*\*\* $P<0.001$  (two-tailed).

**Appendix Table 1** Multicollinearity test

| Variable                     | Unstandardized coefficient |           | Standardized coefficient | <i>t</i> | <i>P</i> | Co-linear statistics |       |
|------------------------------|----------------------------|-----------|--------------------------|----------|----------|----------------------|-------|
|                              | <i>B</i>                   | <i>SE</i> | $\beta$                  |          |          | Tolerance            | VIF   |
| <b>Age</b>                   | -0.010                     | 0.009     | -0.023                   | -1.197   | 0.232    | 0.877                | 1.141 |
| <b>Gender</b>                | -0.009                     | 0.027     | -0.006                   | -0.320   | 0.749    | 0.976                | 1.024 |
| <b>Ethnicity</b>             | -0.134                     | 0.020     | -0.124                   | -6.781   | 0.000    | 0.938                | 1.066 |
| <b>Physical activity</b>     | 0.028                      | 0.006     | 0.090                    | 4.740    | 0.000    | 0.868                | 1.152 |
| <b>School connectedness</b>  | -0.005                     | 0.004     | -0.026                   | -1.313   | 0.189    | 0.788                | 1.270 |
| <b>Subjective well-being</b> | 0.001                      | 0.002     | 0.005                    | 0.239    | 0.811    | 0.644                | 1.553 |
| <b>Resilience</b>            | -0.002                     | 0.001     | -0.050                   | -2.342   | 0.019    | 0.694                | 1.442 |

**Notes:** Dependent variable is parental absence.

**Appendix Table 2** Path coefficients of the mediation model

| <b>Path</b>                                         | <b>Unstandardized coefficient</b> | <b>Standardized coefficient</b> | <b>SE</b> | <b><i>t</i></b> | <b><i>P</i></b> |
|-----------------------------------------------------|-----------------------------------|---------------------------------|-----------|-----------------|-----------------|
| <b>Physical activity → School connectedness</b>     | 0.428                             | 0.246                           | 0.040     | 10.634          | <0.001          |
| <b>School connectedness → Subjective well-being</b> | 0.696                             | 0.339                           | 0.042     | 16.753          | <0.001          |
| <b>Physical activity → Subjective well-being</b>    | 0.744                             | 0.209                           | 0.073     | 10.174          | <0.001          |
| <b>Gender → Subjective well-being</b>               | -0.119                            | -0.044                          | 0.045     | -2.663          | 0.008           |
| <b>Age → Subjective well-being</b>                  | -0.132                            | -0.163                          | 0.013     | -9.864          | <0.001          |
| <b>Ethnicity → Subjective well-being</b>            | 0.280                             | 0.145                           | 0.032     | 8.779           | <0.001          |

**Appendix Table 3a** Multi-group comparison of adaptation

| <b>Model</b>                  | <b>CMIN</b> | <b>DF</b> | <b>P</b> | <b>CMIN/DF</b> |
|-------------------------------|-------------|-----------|----------|----------------|
| <b>Unconstrained</b>          | 2052.108    | 660       | <0.001   | 3.109          |
| <b>Measurement weights</b>    | 2082.752    | 690       | <0.001   | 3.018          |
| <b>Structural weights</b>     | 2118.726    | 710       | <0.001   | 2.984          |
| <b>Structural covariances</b> | 2435.191    | 728       | <0.001   | 3.345          |
| <b>Structural residuals</b>   | 2449.502    | 732       | <0.001   | 3.346          |
| <b>Measurement residuals</b>  | 2552.015    | 772       | <0.001   | 3.306          |

**Appendix Table 3b** Multi-group comparison of adaptation

| <b>Model</b>                  | <b>NFI</b> | <b>RFI</b> | <b>IFI</b> | <b>TLI</b> | <b>CFI</b> | <b>GFI</b> | <b>AGFI</b> | <b>PGFI</b> | <b>RMSEA</b> | <b>AIC</b> | <b>ECVI</b> |
|-------------------------------|------------|------------|------------|------------|------------|------------|-------------|-------------|--------------|------------|-------------|
| <b>Unconstrained</b>          | 0.945      | 0.937      | 0.962      | 0.956      | 0.962      | 0.946      | 0.932       | 0.754       | 0.026        | 2388.108   | 0.761       |
| <b>Measurement weights</b>    | 0.944      | 0.939      | 0.962      | 0.958      | 0.962      | 0.945      | 0.934       | 0.788       | 0.025        | 2358.752   | 0.751       |
| <b>Structural weights</b>     | 0.943      | 0.939      | 0.962      | 0.959      | 0.962      | 0.944      | 0.935       | 0.810       | 0.025        | 2354.726   | 0.750       |
| <b>Structural covariances</b> | 0.935      | 0.932      | 0.953      | 0.951      | 0.953      | 0.938      | 0.929       | 0.824       | 0.027        | 2635.191   | 0.839       |
| <b>Structural residuals</b>   | 0.934      | 0.932      | 0.953      | 0.951      | 0.953      | 0.937      | 0.929       | 0.829       | 0.027        | 2641.502   | 0.841       |
| <b>Measurement residuals</b>  | 0.932      | 0.933      | 0.951      | 0.952      | 0.951      | 0.935      | 0.931       | 0.872       | 0.027        | 2664.015   | 0.848       |

**Appendix Table 4** Invariance test

| <b>Model</b>                  | <b>delta-CMIN</b> | <b>delta-DF</b> | <b><i>P</i></b> | <b>delta-NFI</b> | <b>delta-RFI</b> | <b>delta-IFI</b> | <b>delta-TLI</b> | <b>delta-CFI</b> | <b>delta-GFI</b> | <b>delta-AGFI</b> | <b>delta-PGFI</b> |
|-------------------------------|-------------------|-----------------|-----------------|------------------|------------------|------------------|------------------|------------------|------------------|-------------------|-------------------|
| <b>Measurement weights</b>    | 30.644            | 30              | 0.433           | -0.001           | 0.002            | 0.000            | 0.002            | 0.000            | -0.001           | 0.002             | 0.034             |
| <b>Structural weights</b>     | 35.974            | 20              | 0.015           | -0.001           | 0.000            | 0.000            | 0.001            | 0.000            | -0.001           | 0.001             | 0.022             |
| <b>Structural covariances</b> | 316.465           | 18              | <0.001          | -0.008           | -0.007           | -0.009           | -0.008           | -0.009           | -0.006           | -0.006            | 0.014             |
| <b>Structural residuals</b>   | 14.311            | 4               | 0.006           | -0.001           | 0.000            | 0.000            | 0.000            | 0.000            | -0.001           | 0.000             | 0.005             |
| <b>Measurement residuals</b>  | 102.513           | 40              | <0.001          | -0.002           | 0.001            | -0.002           | 0.001            | -0.002           | -0.002           | 0.002             | 0.043             |
