# Supplementary material for: The association between physical activity and subjective well-being among adolescents in southwest China by parental absence: a moderated mediation model
Source: Springer Nature journal article supplement (doi:10.1186/s12888-023-04982-8), 2023-07-10
Supplement: MOESM2 [file 25599108]

**Appendix 2** The Connor-Davidson resilience scale (CD-RISC)

| Item                                               | 0=not true at all | 1=rarely true | 2=sometimes true | 3=often true | 4=true nearly all of the time |
|----------------------------------------------------|-------------------|---------------|------------------|--------------|-------------------------------|
| 1. Able to adapt to change                         |                   |               |                  |              |                               |
| 2. Close and secure relationships                  |                   |               |                  |              |                               |
| 3. Sometimes fate or God can help                  |                   |               |                  |              |                               |
| 4. Can deal with whatever comes                    |                   |               |                  |              |                               |
| 5. Past success gives confidence for new challenge |                   |               |                  |              |                               |
| 6. See the humorous side of things                 |                   |               |                  |              |                               |
| 7. Coping with stress strengthens                  |                   |               |                  |              |                               |
| 8. Tend to bounce back after illness or hardship   |                   |               |                  |              |                               |
| 9. Things happen for a reason                      |                   |               |                  |              |                               |
| 10. Best effort no matter what                     |                   |               |                  |              |                               |
| 11. You can achieve your goals                     |                   |               |                  |              |                               |
| 12. When things look hopeless, I don't give up     |                   |               |                  |              |                               |
| 13. Know where to turn for help                    |                   |               |                  |              |                               |
| 14. Under pressure, focus and think clearly        |                   |               |                  |              |                               |
| 15. Prefer to take the lead in problem solving     |                   |               |                  |              |                               |
| 16. Not easily discouraged by failure              |                   |               |                  |              |                               |
| 17. Think of self as strong person                 |                   |               |                  |              |                               |
| 18. Make unpopular or difficult decisions          |                   |               |                  |              |                               |
| 19. Can handle unpleasant feelings                 |                   |               |                  |              |                               |
| 20. Have to act on a hunch                         |                   |               |                  |              |                               |
| 21. Strong sense of purpose                        |                   |               |                  |              |                               |
| 22. In control of your life                        |                   |               |                  |              |                               |
| 23. I like challenges                              |                   |               |                  |              |                               |
| 24. You work to attain your goals                  |                   |               |                  |              |                               |
| 25. Pride in your achievements                     |                   |               |                  |              |                               |

**Notes:** Items 11, 12, 13, 14, 15, 16, 17, 18, 19, 20, 21, 22, and 23 are the tenacity subscale; items 1, 5, 7, 8, 9, 10, 24, and 25 are the strength subscale; and items 2, 3, 4, and 6 are the optimism subscale.
